# Supplementary material
Source: publisher site journal article supplement (https://www.dovepress.com/article/488917)
Supplement: Supplementary file 1 [file supplementary figure 1 kalpas consent and authorization (md anderson).pdf › supplementary figure 1 kalpas consent and authorization (md anderson).pdf]

## Consent and Authorization Document

**Study Title:** OPTIMIZING THE USE OF KETAMINE TO REDUCE  
CHRONIC POSTSURGICAL PAIN

**Study Sponsor:** New York University School of Medicine

**Funding Source:** National Institutes of Health (NIH)

**Version Date:** 19 Jan 2023

---

Participant's Name

---

Medical Record Number

---

### Part 1 of 2: MASTER CONSENT

#### SUMMARY

You are being invited to take part in a research study. This study is a multi-site study, meaning it will take place at several different locations. Because this is a multi-site study this consent form includes two parts. Part 1 of this consent form is the Master Consent and includes information that applies to all study sites. Part 2 of the consent form is the Study Site Information and includes information specific to the study site where you are being asked to enroll. Both parts together are the legal consent form and must be provided to you.

- The purpose of this study is to see if the drug ketamine reduces chronic (long-term) pain after mastectomy surgery.
- You will be asked to complete a series of questionnaires about your pain, function and mood etc., both before and after surgery. More details are discussed in this document.
- If you participate in the study, you may not get the drug ketamine. You will be randomized to either get ketamine or a placebo (saline that does not have drug).
- The study lasts about 12 months. If you choose to participate, you can still take yourself out of the study later.
- The drug ketamine does have some risks. The risks are explained later in this document.
- You might benefit from this study, but there is no guarantee of benefit.
- Joining this research study is voluntary. You do not have to be in this study

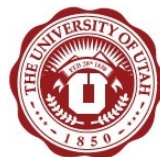

University of Utah  
Institutional Review Board  
Approved 3/13/2024  
Expires 3/12/2025  
IRB\_00138959
